# Supplementary material for: Improved Pregnancy Outcome in Type 1 Diabetic Women With Microalbuminuria or Diabetic Nephropathy
Source: Oxford University Press journal article supplement (doi:10.2337/dc08-1526), 2008-10-23

Figure A1a. Systolic blood pressure levels during pregnancy in 100 type 1 diabetic women with normoalbuminuria (o), 10 women with microalbuminuria (*) and 7 women with diabetic nephropathy (Δ). Mean systolic blood pressure was significantly higher in women with diabetic nephropathy compared with the remaining women (p=0.0095).


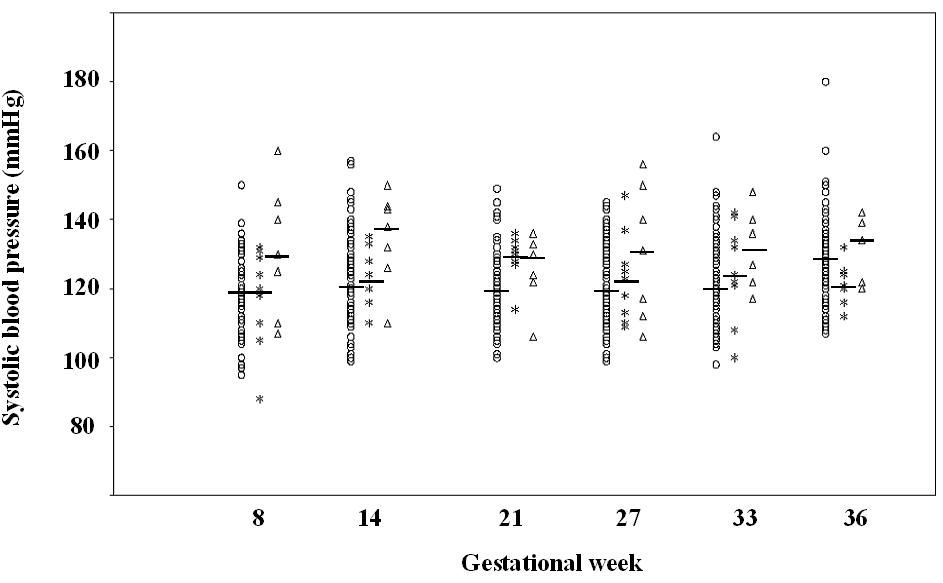


Figure A1b. Diastolic blood pressure levels during pregnancy in 100 type 1 diabetic women with normoalbuminuria (o), 10 women with microalbuminuria (*) and 7 women with diabetic nephropathy (Δ). No differences in mean diastolic blood pressure (p=0.26) were detected between the groups.


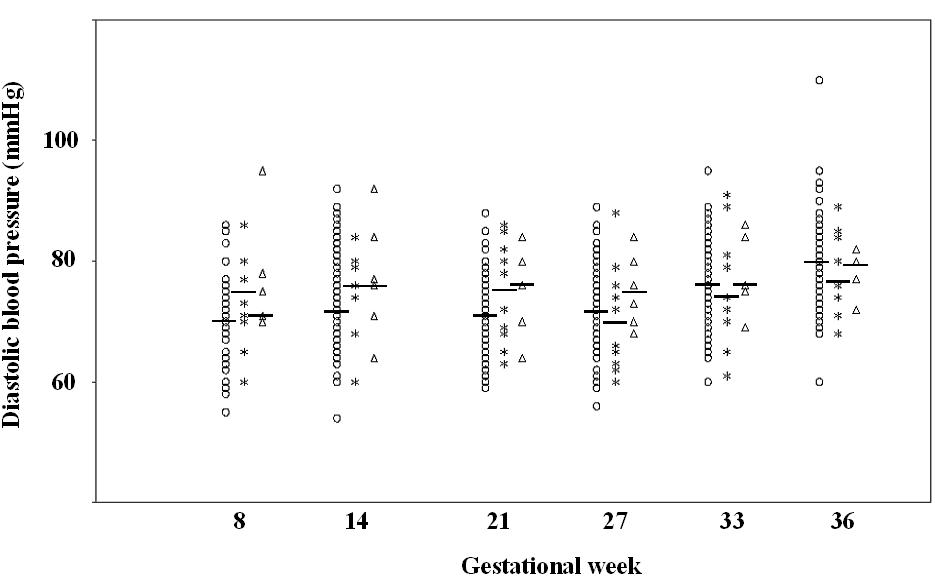


Figure A1c. Urinary albumin excretion during pregnancy in seven women with diabetic nephropathy. Solid black line indicates the median urinary albumin excretion. Solid grey lines represent the urinary albumin excretion levels of each women. Upper dashed line indicates lower range for nephrotic proteinuria (UAE>2,000 mg/24h). Lower dashed line indicates upper range for microalbuminuria (300 mg/24h).


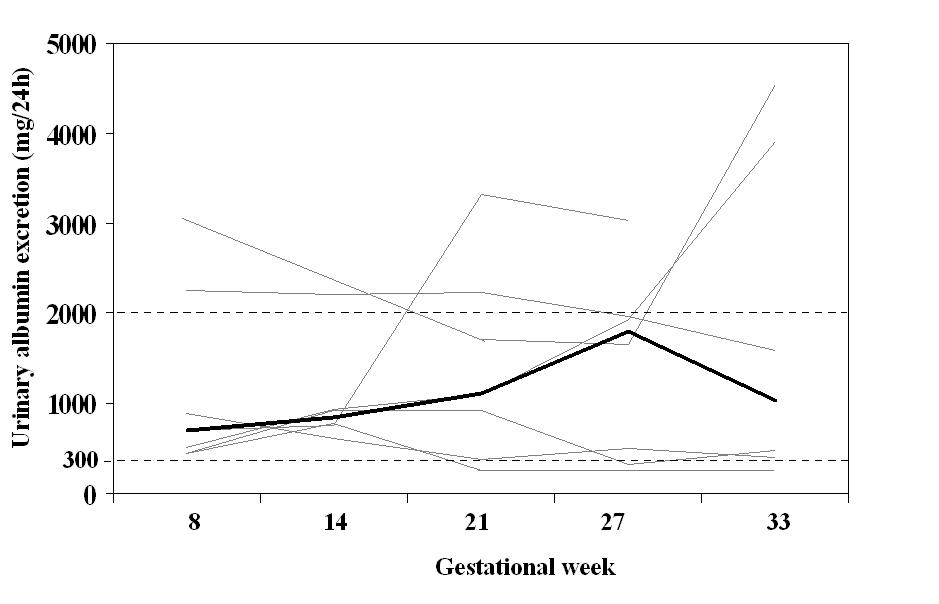


Figure A1d. Hemoglobin A1c (HbA1c) levels during pregnancy in 100 type 1 diabetic women with normoalbuminuria (o), 10 women with microalbuminuria (*) and 7 women with diabetic nephropathy (Δ). No differences were detected between the groups throughout pregnancy (p=0.65).


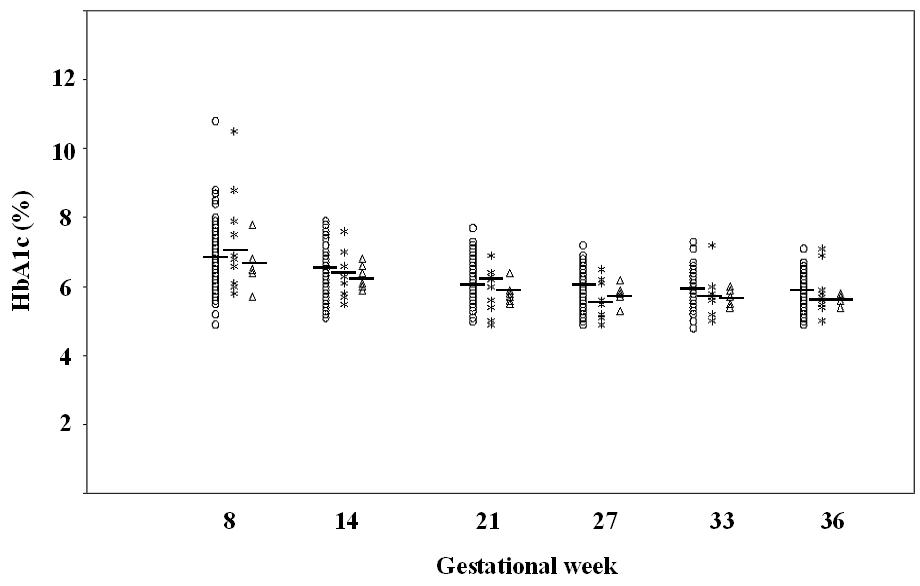


Figure A1e. Self-monitored plasma glucose recordings during pregnancy in 92 type 1 diabetic women with normoalbuminuria (o), 10 women with microalbuminuria (*) and 6 women with diabetic nephropathy (Δ). No differences were detected between the groups throughout pregnancy (p=0.71).


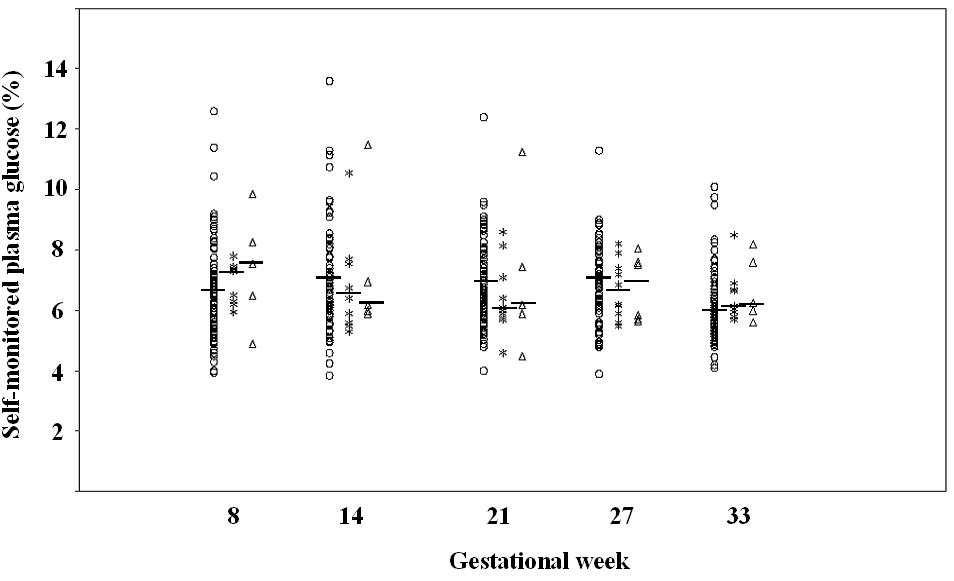

Supplement: dc08-1526_online_appendix_figure.doc [file dc08-1526_online_appendix_figure.doc]
